# What, if anything, is the true neurophysiological significance of rotational dynamics?

Mikhail A. Lebedev<sup>1-3\*</sup>, Nil Adell Mill<sup>4</sup>, Núria Armengol Urpí<sup>5</sup>, Maria R. Cervera<sup>4</sup>, and Miguel A.L. Nicolelis<sup>1,6-10\*</sup>

<sup>1</sup>Duke Center for Neuroengineering, Duke University, Durham, NC, USA; <sup>2</sup>Center for Bioelectric Interfaces of the Institute for Cognitive Neuroscience of the National Research University Higher School of Economics, Moscow, Russia; <sup>3</sup>Department of Information and Internet Technologies of Digital Health Institute, I.M. Sechenov First Moscow State Medical University, Moscow, Russia; <sup>4</sup>Institute of Neuroinformatics, University of Zurich and ETH Zurich, Switzerland; <sup>5</sup>D-MAVT ETH Zurich, Switzerland; <sup>6</sup>Department of Neurobiology, Duke University Medical Center, Durham, NC, USA; <sup>7</sup>Department of Neurology, Duke University, Durham, NC, USA; <sup>8</sup>Department of Neurosurgery, Duke University, Durham, NC, USA; <sup>9</sup>Department of Psychology and Neuroscience, Duke University, Durham, NC, USA; <sup>10</sup>Edmond and Lily Safra International Institute of Neurosciences of Natal, Natal, Brazil  
\*Correspondence: [mikhail.lebedev@gmail.com](mailto:mikhail.lebedev@gmail.com); [nicoleli@neuro.duke.edu](mailto:nicoleli@neuro.duke.edu)

Back in 2012, Churchland and his colleagues proposed that “rotational dynamics”, uncovered through linear transformations of multidimensional neuronal data, represents a fundamental type of neuronal population processing in a variety of organisms, from the isolated leech central nervous system to the primate motor cortex. Here, we evaluated this claim using Churchland’s own data and simple simulations of neuronal responses. We observed that rotational patterns occurred in neuronal populations when (1) there was a temporal shift in peak firing rates exhibited by individual neurons, and (2) the temporal sequence of peak rates remained consistent across different experimental conditions. Provided that such a temporal order of peak firing rates existed, rotational patterns could be easily obtained using a rather arbitrary computer simulation of neural activity; no special provisions were needed for modeling motor cortical responses. Additionally, arbitrary traces, such as Lissajous curves, could be easily obtained from Churchland’s data with multiple linear regression. While these observations suggest that “rotational dynamics” depict an orderly activation of different neurons in a population, we express doubt about Churchland et al.’s exaggerated assessment that this activity pattern is related to “an unexpected yet surprisingly simple structure in the population response” which “explains many of the confusing features of individual neural responses.” Instead, we argue that their rotational dynamics approach provides little, if any, insight on the underlying neuronal mechanisms employed by neuronal ensembles to encode motor behaviors in any species.

## Introduction

It is well known that individual neurons in cortical motor areas transiently modulate their firing rates following a stimulus that triggers the production of a voluntary movement (Evarts 1972). These neuronal modulations have been shown to represent various motor parameters, for example movement direction (Georgopoulos, Kalaska et al. 1982), although the specifics of these representations are still a matter of debate (Georgopoulos, Ashe et al. 1992, Kakei, Hoffman et al. 1999, Zhuang, Lebedev et al. 2014). With the development of multichannel recordings (Nicolelis, Dimitrov et al. 2003, Schwarz, Lebedev et al. 2014), it has become possible to study modulations recorded in multiple cortical neurons simultaneously. This methodological advance led to many studies attempting to uncover how neuronal populations process information (Chapin and Nicolelis 1999, Laubach, Shuler et al. 1999,

Averbeck and Lee 2004, Nicolelis and Lebedev 2009).

Among the studies on motor and premotor cortical neuronal populations, one paper by Churchland and his colleagues (Churchland, Cunningham et al. 2012) became especially popular. In their work, Churchland et al. claimed to have discovered a unique property of cortical population activity that they called “rotational dynamics.” Their analysis is based on the idea that motor cortical activity could be modeled as a dynamical system:

$$\dot{X} = M_{skew}X \quad (1)$$

where  $X$  is a multidimensional vector representing neuronal population activity,  $\dot{X}$  is its time derivative and  $M_{skew}$  is the transform matrix.  $M_{skew}$  has imaginary eigenvalues, which means that the vector  $\dot{X}$  is turned 90 degrees relative to  $X$  (Figure 1A) because  $X$  rotates (Garfinkel, Shevtsov et al. 2017). In the analysis

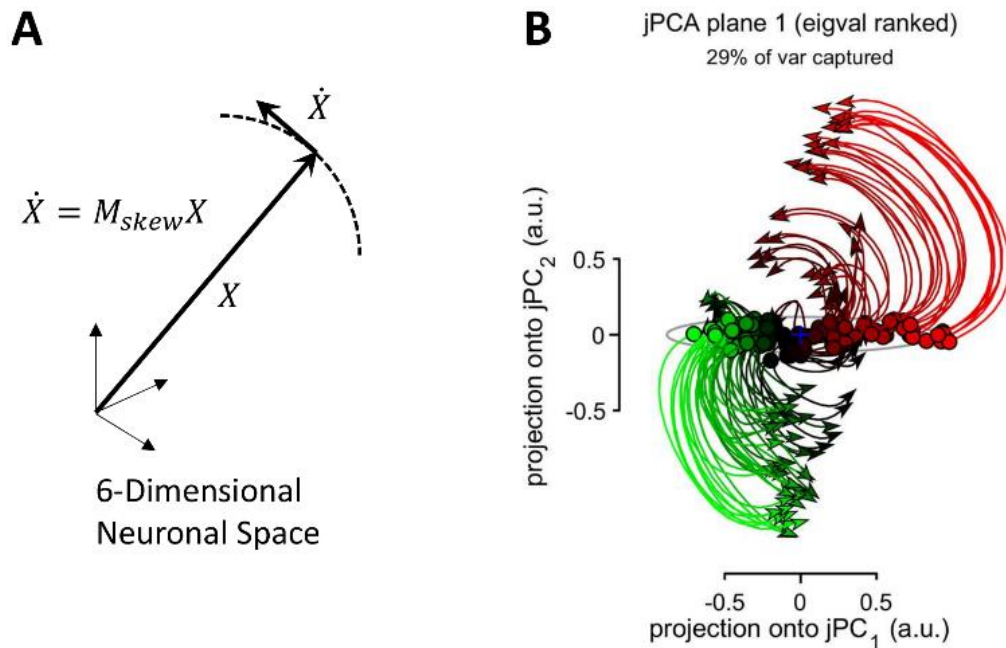

**Figure 1. Rotation in a multidimensional neuronal space.** **A:** Schematics of “rotational dynamics”, where there is an angle between the neuronal vector,  $X$ , and its time derivative,  $\dot{X}$ , meaning that  $X$  is turning. In jPCA proposed by Churchland et al. (2012),  $X$  is formed by the first six PC of the population activity. **B:** Application of jPCA to neuronal data. Curves represent experimental conditions, where a monkey performed armed reaching with different trajectories. The color of the curves (red, green, black) corresponds to different levels of premovement activity.

of Churchland et al., vector  $X$  is produced from the activity of neuronal populations by the application of principal component analysis (PCA). The first six principal components (PCs) are selected to avoid overfitting that could take place with a larger number of dimensions. Hence,  $X$  is six-dimensional. Next, a method called jPCA is applied to compute  $M_{skew}$  and the corresponding eigenvectors. Churchland et al. projected PC data to the plane defined by the first two most prominent rotational components generated with jPCA and obtained convincing looking figures, where population responses rotated in the same direction for different experimental conditions (Figure 1B).

According to the interpretation of Churchland et al., “rotational dynamics” are a fundamental feature of population activity in the motor and premotor cortical areas and a proof that motor cortical populations act as a dynamical system rather than representing various motor parameters by their firing. They called the rotational effect an “orderly rotational structure, across conditions, at the population level”, a “brief but strong oscillatory component, something quite unexpected for a non-periodic behavior”, and “not trivial” observations that are “largely expected for a

neural dynamical system that generates rhythmic output.”

While this proposal has merits, we found the results of Churchland et al. difficult to comprehend because of the lack of clarity regarding the concrete neuronal patterns contributing to the rotations revealed by jPCA. For example, they suggested that “motor cortex responses reflect the evolution of a neural dynamical system, starting at an initial state set by preparatory activity [...]. If the rotations of the neural state [...] reflect straightforward dynamics, then similar rotations should be seen for all conditions. In particular, the neural state should rotate in the same direction for all conditions, even when reaches are in opposition” – a statement that is hard to understand. Particularly, it is unclear what “straightforward dynamics” are and why it imposes the same rotational patterns on all conditions. The major obstacle to understanding the proposal of Churchland et al. is the absence of a clear explanation of how individual neurons and/or their populations contribute to the rotational patterns revealed by jPCA.

To eliminate this gap in understanding, we reanalyzed some of the data that Churchland et al. made available online. We applied perievent time histograms (PETHs), a basic method for

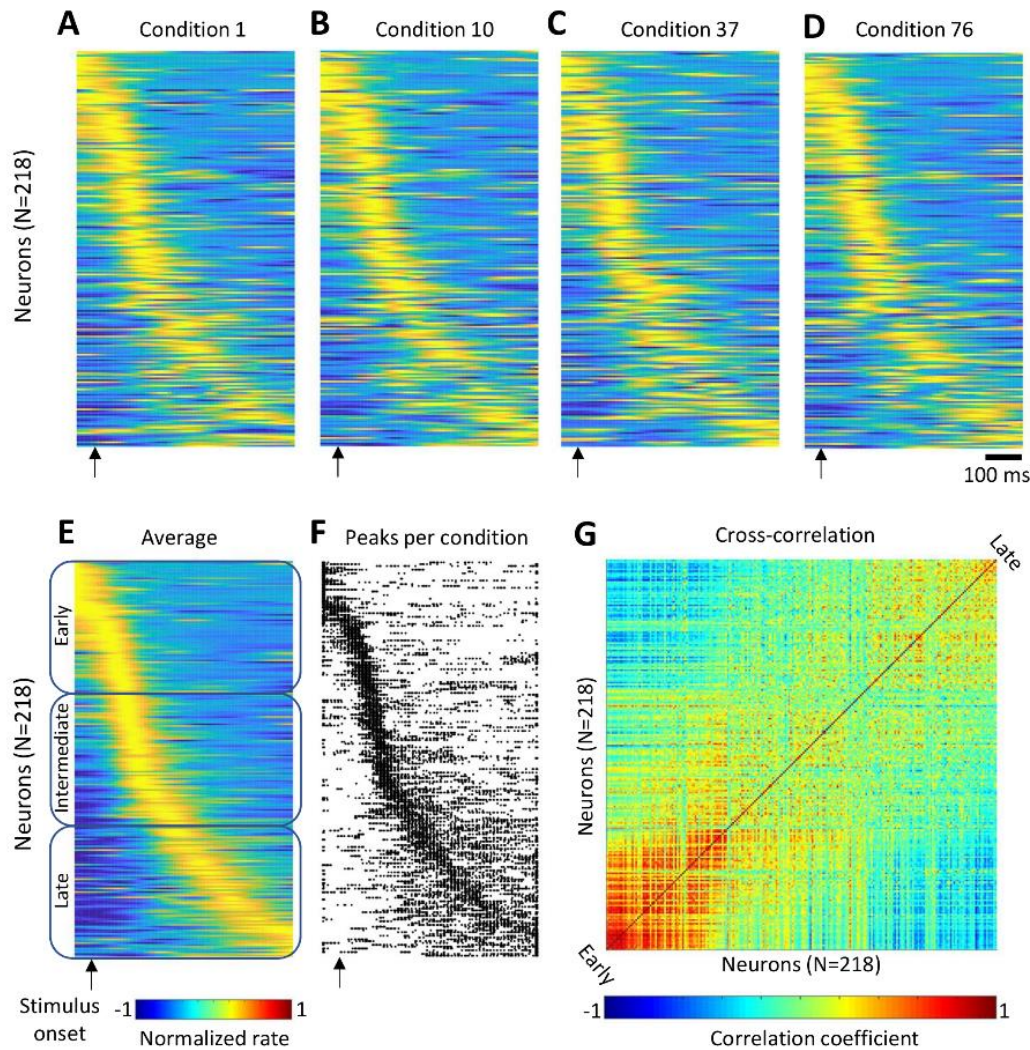

**Figure 2. Time spread in peak firing rates of different neurons in the data provided by Churchland et al. (2012).** **A-D:** Color-coded population PETHs for four representative conditions. Horizontal lines represent PETHs for individual neurons. **E:** PETHs averaged across conditions. From top to bottom: neurons are ordered by the time of peak firing rate, from the earliest activated neurons to the latest. The same order is used in A-D, F and G. The neuronal population was divided into three subpopulations: early (neurons 1-73), intermediate (74-146), and late (147-218). **F:** A scatterplot showing the times of peak firing rates for different neurons and conditions. Peak times are represented by dots. **G:** Pairwise correlation between the activity patterns of different neurons.

displaying neuronal data, to find the underlying cause for the “rotational dynamics.” Next, we ran simple simulations to verify our findings. Based on our results, we found the interpretation offered by Churchland et al. highly overstated and overreaching. Even though the “rotational dynamics” appear to represent a certain temporal order in which different cortical neurons are activated during a behavioral task, and which is consistent across conditions, we are not convinced that this observation could significantly “help transcend the controversy over what single neurons in motor cortex code or represent,” as stated by Churchland and his colleagues.

## Results

Rotation in a multidimensional neuronal space could be thought of as a process where individual neurons are activated in a certain order, which results in the neuronal vector  $X$  changing orientation (Figure 1A). Such a pattern can be also described as a phase shift between the responses of different neurons. Consider the simplest case of a population that consists of two neurons where the activity of the first neuron is a sine function of time and activity of the second neuron is a cosine. Since the phase shift between the responses of these neurons is 90 degrees, a two-dimensional plot with the firing rates of these neurons on the axes produces circular or elliptical trajectories. This



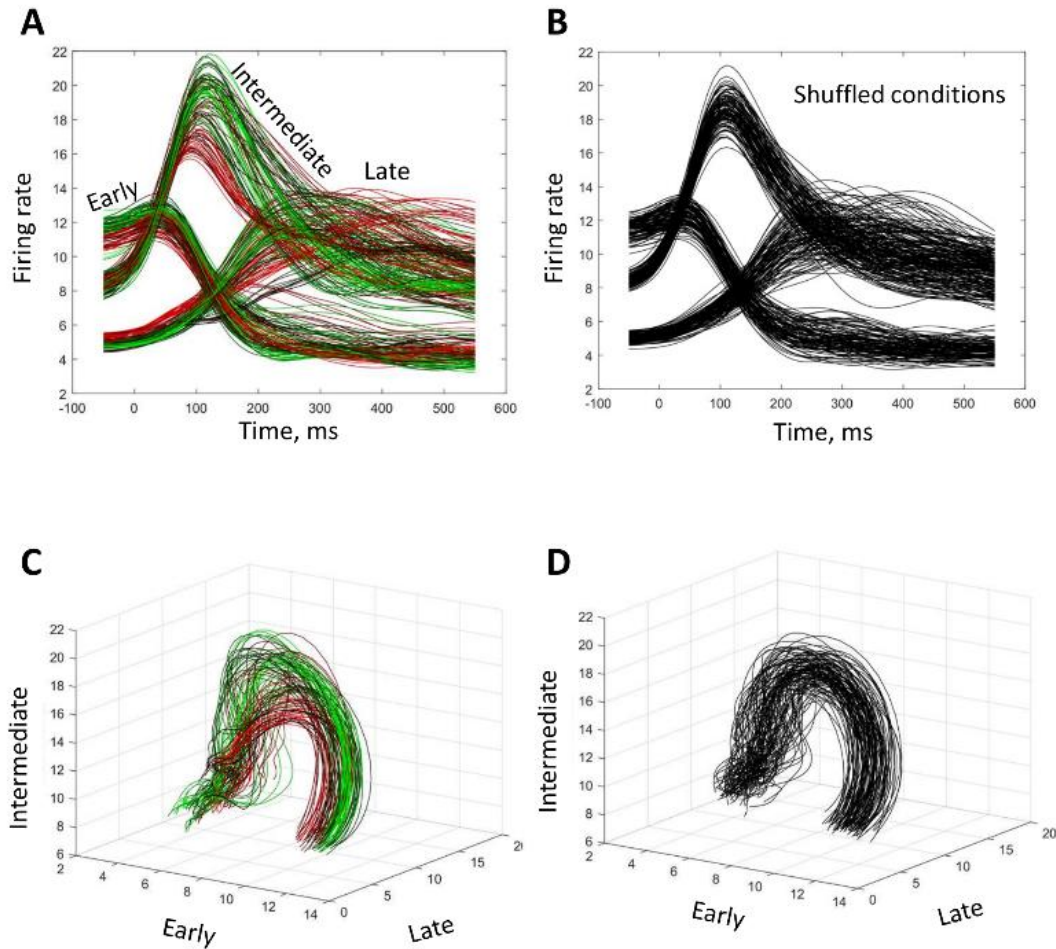

**Figure 3. “Rotational dynamics” revealed by splitting neuronal population into the early, intermediate and late activated subpopulations.** **A:** Average PETHs for the three subpopulations, for different experimental conditions. The composition of the subpopulations is shown in Figure 2E. Color coding of the traces is the same as in Figure 1B. **B:** Average PETHs for the shuffled-conditions data. **C,D:** “Rotational dynamics” shown as three-dimensional plots with the axes representing average PETHs for different subpopulations. Original (C) and shuffled (D) datasets are shown.

type of trajectory is observed for all conditions if the phase shift between the neurons persists.

Following this logic, we hypothesized that the data of Churchland et al. contained phase shifts between the neurons, which remained consistent across conditions. To test this hypothesis, we analyzed their data using the traditional PETH method. The dataset included PETHs of 218 neurons calculated for 108 experimental conditions. Each condition corresponded to a monkey performing a reaching movement with a straight or convoluted trajectory. We simply stacked these PETHs to produce population color plots for different conditions (Figure 2A-D). Additionally, we averaged the PETHs across all conditions to obtain average responses for each neuron (Figure 2E). For the average PETHs, we calculated peak values and reordered the neurons according to the value of the time when each neuron reached its peak firing rate. In the

color plot showing the average PETHs (Figure 2E), PETHs of the neurons activated early are plotted at the top and PETHs of the neurons activated late are plotted at the bottom, which results in a clear display of an activity wave running across the neurons in the population. Exactly the same reordering was applied to the PETHs for the individual conditions (Figure 2A-D). In the PETHs for individual conditions, the temporal order of responses persisted with some jitter (e.g., compare panels A, B, C and D in Figure 2). The same sequence of responses is also clear in the scatterplot that displays the time of peak response for different conditions and different neurons (Figure 2F). Additionally, pairwise correlations are strong for the neurons with similar occurrences of response and weak (or negative) for the neurons with dissimilar occurrences (Figure 2G). Thus, the PETH analysis showed that in Churchland’s data neurons responded in a certain temporal order, and this

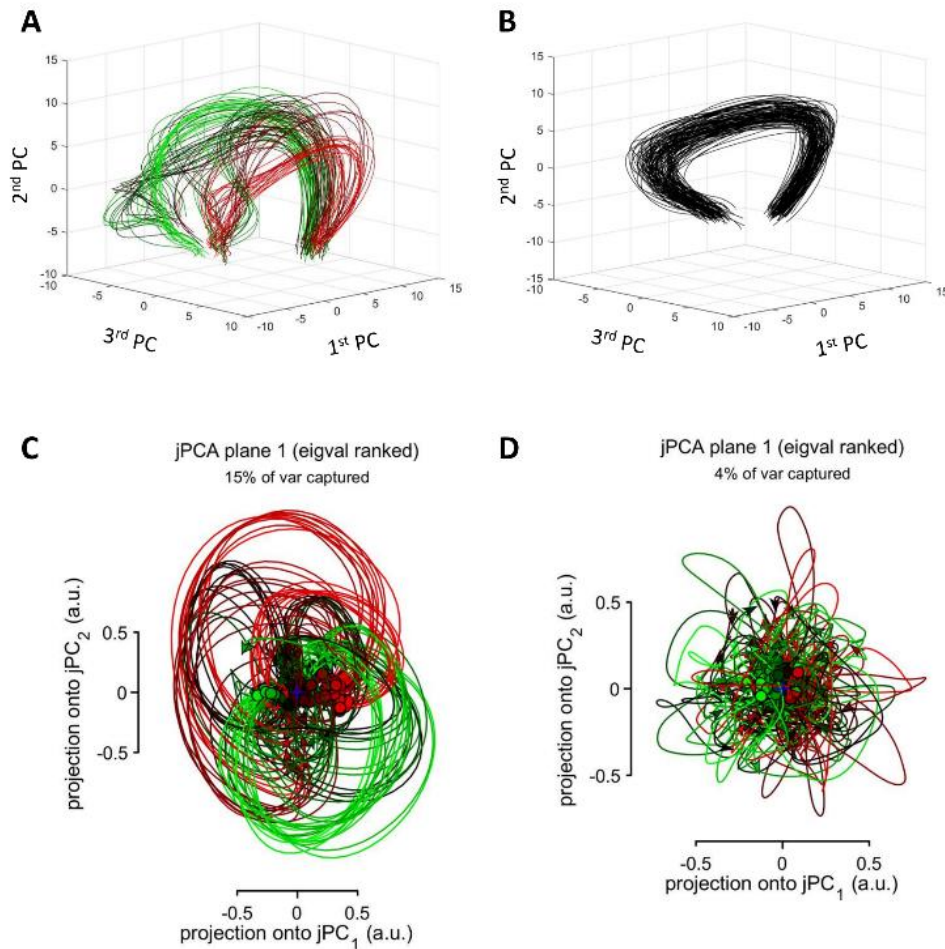

**Figure 4. Rotations of principal components.** **A:** The first three PCs plotted as a three-dimensional plot. Color conventions as in Figure 1B. **B:** PCs for the data with shuffled conditions. **C:** jPCA results for the data in A. **D:** jPCA results for the data in B.

order persisted even when the monkey altered the way it performed a reaching movement.

To further illustrate how the activation order of different neurons contributed to a population rotational pattern, we split the entire neuronal population into three subpopulations: neurons with early peaks (ranks 1-73), intermediate peaks (74-146), and late peaks (147-218) (Figure 2E). Next, we calculated average PETHs for each subpopulation and for each experimental condition (Figure 3A). As expected, this plot revealed three groups of PETHs (early-peak, intermediate-peak and late-peak) whose shapes did not change substantially across conditions. Plotting these PETHs in a three-dimensional space (where dimensions corresponded to the subpopulations) yielded a family of curved trace (Figure 3C) that resembled the circles obtained with jPCA (Figure 1B). As an additional control, we randomly shuffled conditions for each neuron and plotted the curves for the shuffled data (Figure 3B,D). Both the average PETHs for the subpopulations

(Figure 3B) and the three-dimensional plot (Figure 3D) were little affected by the shuffling procedure, which confirmed that the activation order of the neurons was approximately the same for different conditions.

To further clarify the origin of the rotational patterns, we calculated the initial three PCs for the data of Churchland et al. and plotted them as a three-dimensional plot (Figure 4A). The PC traces were clearly curved. Additionally, distinct clusters of conditions were visible in the plots, each of them containing several traces that had similar shapes. The clusters started from approximately the same point but separated toward the end of the trial. Despite the differences between the clusters, they rotated in approximately the same fashion (e.g., in the plane defined by the first and second PCs). Thus, “rotational dynamics” were clearly visible even before the application of jPCA. As to jPCA, it also yielded several clusters of circles (Figure 4C). Rotations were also present after experimental conditions were randomly shuffled for each

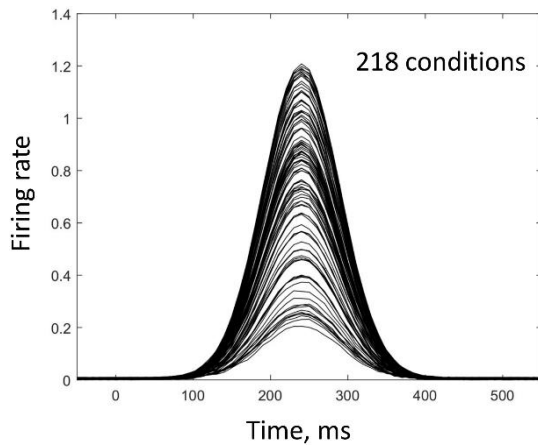

**Figure 5. Simulated responses for an individual neuron.** Neuronal responses were simulated using a Gaussian function. Response amplitude was randomly drawn from a uniform distribution (in the interval 0.2-1.2).

neuron. The PC traces for the shuffled data were clearly curved, although the condition-specific clusters were removed by the shuffling procedure (Figure 4B). Yet, jPCA failed to detect this curvature and returned noisy traces (Figure 4D) because the algorithm operated on the ill-conditioned data (Golub and Van Loan 2012) produced from very similar entries for different conditions. (The same problem occurs, for example, for simulated neurons with half of the neurons with a sine-shaped response and the other half with a cosine-shaped. Although this is an obvious case of “rotational dynamics,” because of the data being ill-conditioned, the jPCA algorithm fails to produce circles. This problem can be handled by shifting the responses of simulated neurons in time for different conditions; see below.)

Having established that neurons were activated in consistent temporal order in Churchland’s data, we examined this effect further using a simulation of population activity. The simulation was very simple and did not incorporate any specific features of motor cortical responses. For example, simulated neurons were not directionally tuned and instead each of them exhibited random amplitude of response for different conditions. Because of this randomness, response amplitude was not correlated in any pair of neurons. The only nonrandom pattern that we simulated was the presence of a sequence of responses in different neurons. The shape of simulated PETHs was a Gaussian function with an amplitude drawn from a uniform distribution (Figure 5). We simulated 208 neurons and 108 conditions to match Churchland’s data.

We started with a simulation, where the responses of different neurons were shifted in time: neuron  $i$  responded 10 ms later than neuron  $i-1$  (Figure 6A). This simulation produced a wave of activity running through the neuronal population. Since the neuronal patterns were very similar for different conditions, the data was ill-conditioned, and jPCA analysis returned noise (Figure 6B) even though the input data contained the major ingredient of “rotational dynamics.” The problem of ill-conditioning could be easily solved by introducing some variability to the conditions. We simulated two groups of conditions: for conditions 1-54, the first neuron exhibited peak activity at time  $t = 50$ ms, and for conditions 55-108 the time of its peak activity was  $t = 200$ ms (Figure 6C). The structure of the activity wave (i.e. the rule that neuron  $i$  responded 10 ms later than neuron  $i-1$ ) was the same for both groups of trials. Such groups of trials would occur if a monkey on some trials waited for an additional 150 ms before initiating the movement. This slight alteration of the data, which did not change the structure of the population response, was sufficient for jPCA to start generating circles (Figure 6D). We also simulated three groups of conditions, where the first neuron’s peak rate occurred at 50, 150 and 200 ms for the first, second and third groups, respectively (Figure 6E). The structure of the population wave was the same for all three groups. In this case, again, jPCA returned circles (Figure 6F).

To verify that a temporal sequence of activation was necessary for the rotation pattern to occur, we simulated neuronal populations without any spread in peak activity times (Figure 7). The shapes of neuronal responses were the same as in the previous simulation (Figure 5). In this case, jPCA failed to generate circles (Figure 7B) even when three groups of conditions were simulated with shifted activity onsets (Figure 7A).

Mathematically, the method proposed by Churchland et al. consists of fitting the population activity vector to its first derivative (equation 1) with the goal of extracting a rotational structure. We asked if this goal could be achieved with a more direct approach. In this analysis, we utilized multiple linear regression to fit neuronal data to a circle:

$$x = \cos \frac{2\pi t}{T}; y = \sin \frac{2\pi t}{T} \quad (2)$$

or to the Lissajous curve shaped as  $\infty$ :

$$x = \cos \frac{2\pi t}{T}; y = \sin \frac{4\pi t}{T} \quad (3)$$

where  $t$  is time and  $T$  is trial duration. The regression worked well for both shapes (Figure

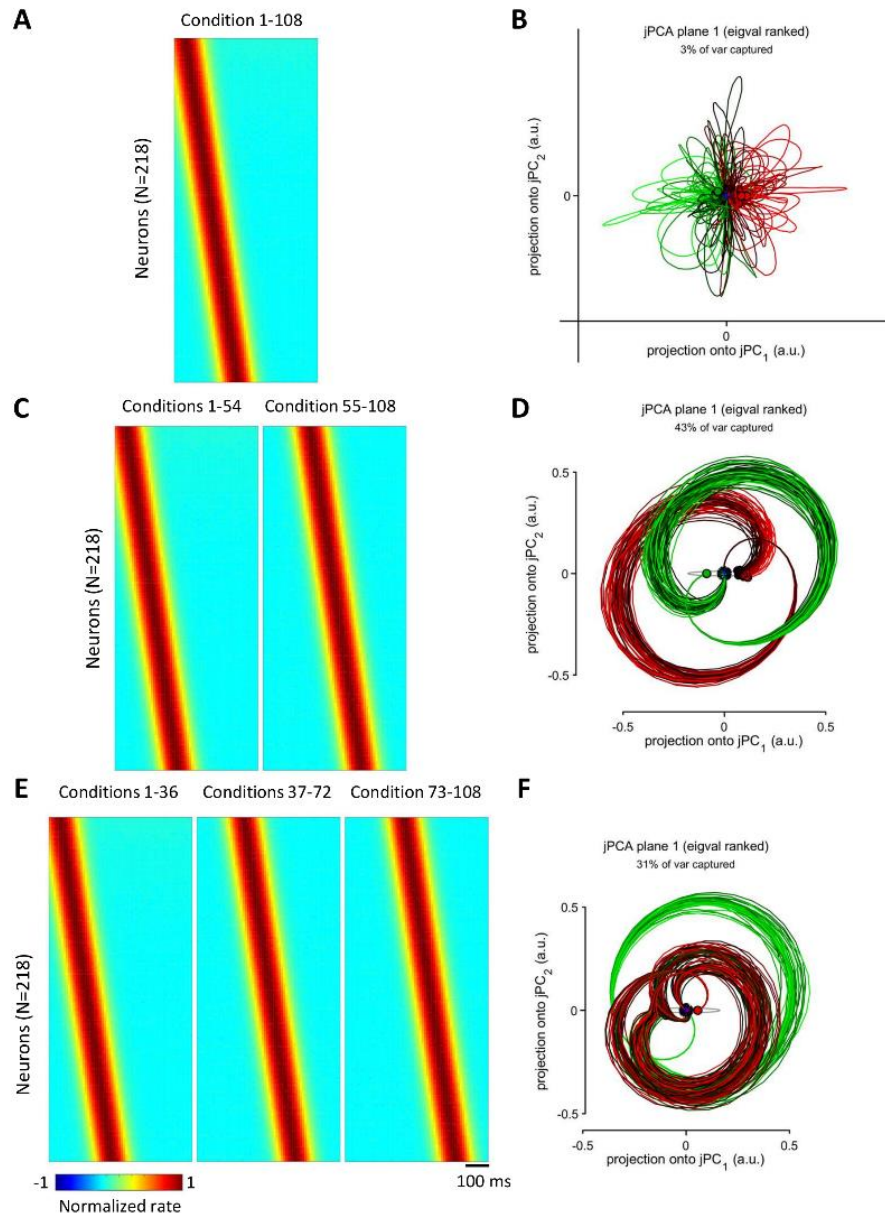

**Figure 6. Simulated population responses with a time spread of peak firing rates.** **A:** PETHs for a simulated wave of population activity, where response of neuron  $i$  occurs 10 ms later than response of neuron  $i-1$ . **B:** jPCA results for the data in A. **C:** The same population wave as in A with an early onset for conditions 1-54 and late onset for conditions 55-108. **D:** jPCA results for the data in C. **E:** The same population wave as in A and C with three different onsets for conditions 1-36, 37-72 and 73-108. **F:** jPCA results for the data in E.

8A,B), and it even generalized to new conditions, as evident from the analysis where half of the data were used for training the regression model and the other half for generating predictions (Figure 8C,D). The shuffled data could be fit to the Lissajous curves, as well (Figure 8E-H), although the prediction of  $\infty$  was very noisy (Figure 8H).

### Discussion

To clarify the neurophysiological significance of “rotational dynamics,” we have conducted additional analyses of Churchland’s

data and performed simple simulations. In the original dataset, we discovered a temporal order in which the neurons were activated and found that this order was relatively consistent across conditions. We suggest that this is a useful observation that has not been described in sufficient detail in the original article of Churchland et al. We also suggest that it would be useful to add a simple PETHs analysis to any paper that employs jPCA to study “rotational dynamics.” In particular, a PETH analysis would be helpful to add substance to any claim like the “rotational dynamics” persist even though



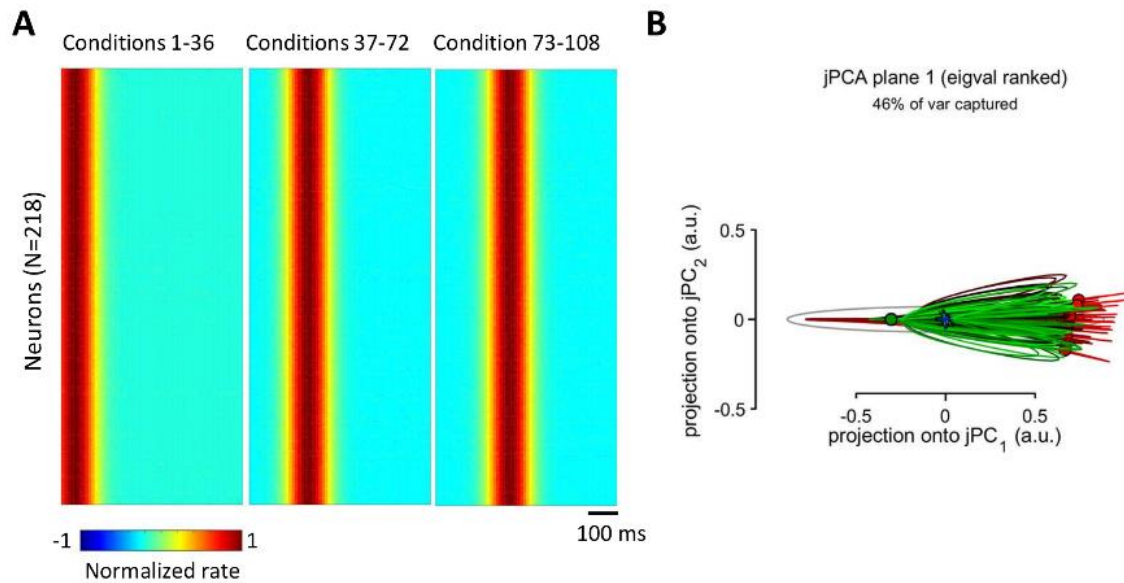

**Figure 7. Simulated population responses without a time spread of peak firing rates. A:** PETHs with different response onsets for conditions 1-36, 37-72 and 73-108. For each group of conditions, peak responses of different neurons were not spread in time. **B:** jPCA results for the data in A.

motor-related patterns are different across condition.

The existence of a temporal spread in neuronal peak rates (or response latencies) has been documented in the literature. For example, Figure 7 in Georgopoulos et al. (Georgopoulos, Kalaska et al. 1982) shows a distribution of the times of onset of the first increase in discharge in motor cortical neurons for center-out arm reaching movements performed by a monkey. The onsets were calculated for the neurons' preferred directions and ranged -300 to 500 ms relative to movement initiation time. In a more recent paper (Ifft, Lebedev et al. 2011), we have demonstrated such a spread for simultaneously recorded populations of neurons recorded in the motor and primary somatosensory cortical areas. It may be true that no previous paper focused on the consistency of neuronal activation order for a range of movements. Yet, there is no emphasis of this result in Churchland's paper. Instead, the authors described the rotational patterns as a population phenomenon that persisted despite a high variability of neuronal responses. The temporal order in which different neurons respond during a motor task could be related to serial information processing. In this respect, it would be interesting to compare peak activity times for different cortical locations, for example in the motor cortex versus premotor cortex. Orderly activity onsets have been reported for different cortical areas. For example, de Lafuente and Romo (2006)

reported that a wave of neuronal activity travelled from the somatosensory cortex to the premotor cortical areas when monkeys performed a task that required perceptual judgment of a tactile stimulus. Possibly, such an activity transfer could be found for neuronal populations confined to a single cortical area. Waves of activity similar to those shown in Figure 2E-F can be found in many other publications (Luczak, Barthó et al. 2007, Gage, Stoetzner et al. 2010, Peyrache, Benchenane et al. 2010, Kvitsiani, Ranade et al. 2013, Bulkin, Law et al. 2016).

Even though the rotational patterns reported by Churchland et al. appear to be related to a certain temporal structure of neuronal responses, we question that they provide a strong evidence in favor of the dynamical-system model of motor cortical processing. Indeed, such a temporal structure could occur for a variety of reasons. For instance, early activated neurons could be involved with the processing of sensory information leading to movements, whereas the later activated neurons could handle motor execution and even reward representation. Calling the neuronal processing chain a "dynamical system" adds a definition but does not really solve the issues related to the mechanisms of neuronal information processing and the representation of different motor parameters.

Rotational patterns could be obtained with little effort using simple and quite arbitrary



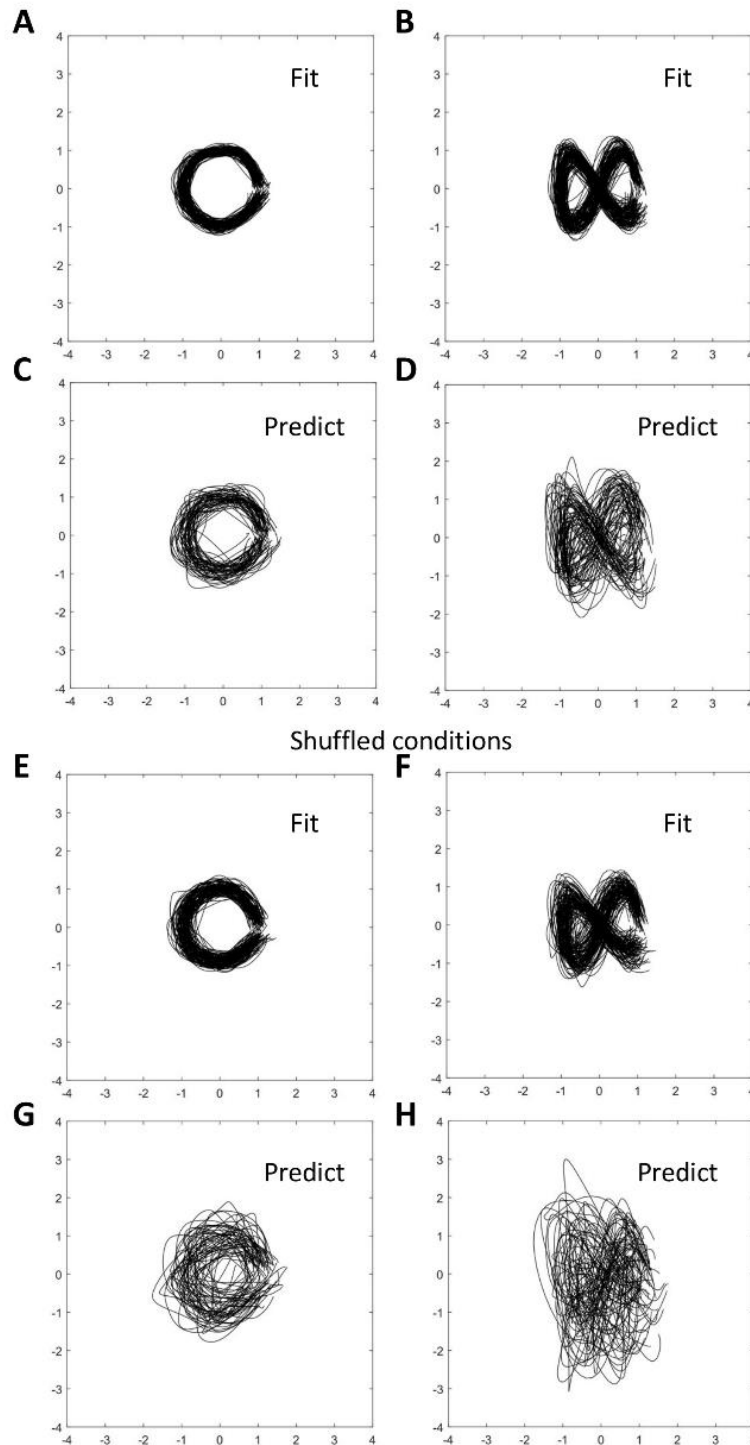

**Figure 8. Fitting population data to Lissajous curves. A:** Fitting to a circle. **B:** Fitting to the curve shaped as  $\infty$ . **C:** Prediction of a circle. Half of the conditions were used to train the regression model; the other half to generate prediction. **D:** Prediction of the  $\infty$  shape. **E-H:** Fitting and predicting for the data with shuffled conditions.

simulations that did not mimic any important property of motor cortical activity, such as directional tuning. It was sufficient for the simulated neurons to respond in a certain temporal sequence for “rotational dynamics” to occur. This observation suggests that the existence of rotation tells us very little about the

function of motor cortical areas. Instead, jPCA appears to be just a way to illustrate the presence of phase shifts between the responses of different neurons rather than a method that provides insights to the underlying neurophysiological mechanisms ruling the function of the motor cortex.

Mathematically, Churchland's method to produce a rotating pattern from neuronal PETHs can be described as linear transformation with a certain number of free parameters. With a sufficient number of free parameters, multiple linear regression can yield practically any desired curve (Babyak 2004). For example, when we applied a multiple linear regression to Churchland's data, we easily produced a variety of Lissajous curves. This transformation even generalized from the training dataset (half of the conditions) to new data in the test dataset (the other half) (Figure 8). Evidently, no one would claim that any of these curves represents a physiologically meaningful neural population mechanism, although we used a linear transformation very similar to the one Churchland and his colleagues employed to generate their curves.

Altogether, our results challenge the conclusions of Churchland and his colleagues. Clearly, their effects simply reflect what one should expect by applying a linear transformation, such as PCA, to reduce the dimensionality of large-dimension data and then adjusting the resulting components to a new basis that reproduces a desired behavior (in this case rotation). PCA (Chapin and Nicolelis 1999) and independent component analysis (Laubach, Shuler et al. 1999) were introduced twenty years ago by our group to extract correlated neuronal patterns and reduce dimensionality of neuronal-ensemble data. While the findings of Churchland and his colleagues can be viewed as an extension of this approach and a method to produce a visually appealing phase plot, we doubt that they have discovered any new neurophysiological mechanism, as claimed in their article. Indeed, the mere fact that neurons in a population respond at different times with respect to a go-cue tells very little about the function of these responses and does not discard any of the previously proposed representational interpretations, such as the suggestion that neuronal populations perform a sensorimotor transformation (Georgopoulos, Lurito et al. 1989, Kalaska 1991, Kakei, Hoffman et al. 2003) or handle specific motor parameters (Georgopoulos, Kalaska et al. 1982, Georgopoulos, Ashe et al. 1992, Kakei, Hoffman et al. 1999, Zhuang, Lebedev et al. 2014). Cortical activity is certainly dynamical in the sense that neuronal rates change in time, but understanding this dynamic requires a much more thorough analysis than the method proposed by Churchland et al.

## Methods

The data (single units and good multiunits recorded in monkey N; the data used to construct Fig. 3f of Churchland et al.) and MATLAB scripts were obtained from Churchland lab's online depository (<https://www.dropbox.com/sh/2q3m5fgfscwf95j/AAC3WV90hHdBgz0Np4RAKJpYa?dl=0>). The dataset contained PETHs for each neuron and each condition. We used the following commands to run Churchland's code:

```
times = -50:10:550; (4)
jPCA_params.numPCs = 6;
[Projection,Summary]=jPCA(Data,times,jPCA_params);
```

This corresponds to the time range -50 to 550ms and six PCs entered in jPCA.

To produce the plots shown in Figure 2A-D, we stacked Churchland's PETHs together, and Figure 2E shows PETHs averaged across conditions. The average PETHs were used to find peak firing rates and the time of their occurrences. PETHs of Figure 2A-E were sorted according to the sequence of these peaks of the average PETHs. To improve the display of phase shifts between the neurons, PETHs of Figure 2A-E were normalized by subtracting the mean and dividing by the peak PETH value. This normalization was used only for plotting the graphs of Figure 2A-E but not for calculating average PETHs for individual neurons (Figure 2E) or neuronal subpopulations (Figure 3).

In the PCA analysis (Figure 4), we standardized PETHs for each neuron by subtracting the overall mean (i.e., average for all conditions combined) and dividing by the overall standard deviation (again, for all conditions combined).

Simulated PETHs (Figure 5) were computed in MATLAB as:

```
PETH = exp(-(times-tau).^2/50)*(0.2+rand(1)); (5)
```

where the time shift,  $\tau$ , was selected to produce 10-ms increments of the delay for the neurons in the sequence (Figure 6). Neither the width of the response nor the amplitude (uniformly distributed from 0.2 to 1.2 in equation 5) were critical for the rotations to occur. However, to cope with the ill-conditioning of the population responses highly correlated across conditions, it was important to introduce temporal variability to the simulated PETHs. This was done by offsetting  $\tau$  for all neurons by the same amount of time for several groups of conditions (Figure 6C,D).

Multiple linear regressions (Figure 8) were implemented in MATLAB (*regress* function). Here, neuronal activity was transformed into Lissajous curves. Fitting (Figure 8A,B,E,F) was

conducted by using the same conditions as the training and test data. Predictions (Figure 8C,D,G,H) were computed by using half of the trials to train the regression model and the other half to test.

## References

- Averbeck, B. B. and D. Lee (2004). "Coding and transmission of information by neural ensembles." Trends in neurosciences **27**(4): 225-230.
- Babyak, M. A. (2004). "What you see may not be what you get: a brief, nontechnical introduction to overfitting in regression-type models." Psychosom Med **66**(3): 411-421.
- Bulkin, D. A., L. M. Law and D. M. Smith (2016). "Placing memories in context: Hippocampal representations promote retrieval of appropriate memories." Hippocampus **26**(7): 958-971.
- Chapin, J. K. and M. A. Nicolelis (1999). "Principal component analysis of neuronal ensemble activity reveals multidimensional somatosensory representations." Journal of neuroscience methods **94**(1): 121-140.
- Churchland, M. M., J. P. Cunningham, M. T. Kaufman, J. D. Foster, P. Nuyujukian, S. I. Ryu and K. V. Shenoy (2012). "Neural population dynamics during reaching." Nature **487**(7405): 51-56.
- de Lafuente, V. and R. Romo (2006). "Neural correlate of subjective sensory experience gradually builds up across cortical areas." Proceedings of the National Academy of Sciences **103**(39): 14266-14271.
- Evarts, E. V. (1972). "Activity of motor cortex neurons in association with learned movement." Int J Neurosci **3**(3): 113-124.
- Gage, G. J., C. R. Stoetznner, A. B. Wiltschko and J. D. Berke (2010). "Selective activation of striatal fast-spiking interneurons during choice execution." Neuron **67**(3): 466-479.
- Garfinkel, A., J. Shevtsov and Y. Guo (2017). Modeling life: the mathematics of biological systems, Springer.
- Georgopoulos, A. P., J. Ashe, N. Smyrnis and M. Taira (1992). "The motor cortex and the coding of force." Science **256**(5064): 1692-1695.
- Georgopoulos, A. P., J. F. Kalaska, R. Caminiti and J. T. Massey (1982). "On the relations between the direction of two-dimensional arm movements and cell discharge in primate motor cortex." J Neurosci **2**(11): 1527-1537.
- Georgopoulos, A. P., J. T. Lurito, M. Petrides, A. B. Schwartz and J. T. Massey (1989). "Mental rotation of the neuronal population vector." Science **243**(4888): 234-236.
- Golub, G. H. and C. F. Van Loan (2012). Matrix computations, JHU press.
- Ifft, P., M. Lebedev and M. A. Nicolelis (2011). "Cortical correlates of Fitts' law." Frontiers in integrative neuroscience **5**: 85.
- Kakei, S., D. S. Hoffman and P. L. Strick (1999). "Muscle and movement representations in the primary motor cortex." Science **285**(5436): 2136-2139.
- Kakei, S., D. S. Hoffman and P. L. Strick (2003). "Sensorimotor transformations in cortical motor areas." Neuroscience research **46**(1): 1-10.
- Kalaska, J. (1991). Reaching movements to visual targets: Neuronal representations of sensori-motor transformations. Seminars in Neuroscience, Elsevier.
- Kvitsiani, D., S. Ranade, B. Hangya, H. Taniguchi, J. Huang and A. Kepecs (2013). "Distinct behavioural and network correlates of two interneuron types in prefrontal cortex." Nature **498**(7454): 363.
- Laubach, M., M. Shuler and M. A. Nicolelis (1999). "Independent component analyses for quantifying neuronal ensemble interactions." Journal of neuroscience methods **94**(1): 141-154.
- Luczak, A., P. Barthó, S. L. Marguet, G. Buzsáki and K. D. Harris (2007). "Sequential structure of neocortical spontaneous activity in vivo." Proceedings of the National Academy of Sciences **104**(1): 347-352.
- Nicolelis, M. A., D. Dimitrov, J. M. Carmena, R. Crist, G. Lehew, J. D. Kralik and S. P. Wise (2003). "Chronic, multisite, multielectrode recordings in macaque monkeys." Proceedings of the National Academy of Sciences **100**(19): 11041-11046.
- Nicolelis, M. A. and M. A. Lebedev (2009). "Principles of neural ensemble physiology underlying the operation of brain-machine interfaces." Nature reviews neuroscience **10**(7): 530.
- Peyrache, A., K. Benchenane, M. Khamassi, S. Wiener and F. Battaglia (2010). "Sequential reinstatement of neocortical activity during slow oscillations depends on cells' global activity." Frontiers in Systems Neuroscience **3**(18).
- Schwarz, D. A., M. A. Lebedev, T. L. Hanson, D. F. Dimitrov, G. Lehew, J. Meloy, S. Rajangam, V. Subramanian, P. J. Ifft and Z. Li (2014). "Chronic, wireless recordings of large-scale brain activity in freely moving rhesus monkeys." Nature methods **11**(6): 670.
- Zhuang, K. Z., M. A. Lebedev and M. A. Nicolelis (2014). "Joint cross-correlation analysis reveals complex, time-dependent functional relationship between cortical neurons and arm electromyograms." J Neurophysiol **112**(11): 2865-2887.
